# Supplementary material for: PDE12 removes mitochondrial RNA poly(A) tails and controls translation in human mitochondria
Source: PubMed Central journal article supplement — Nucleic Acids Res. 2011 Jun 11;39(17):7750–63. doi: 10.1093/nar/gkr470 (PMC3177208; doi:10.1093/nar/gkr470), 2011-06-11

# **PDE12 removes mitochondrial RNA poly(A) tails and controls translation in human mitochondria**

Rorbach *et al.*

## **SUPPLEMENTARY DATA**

### **SUPPLEMENTARY MATERIALS AND METHODS**

#### **Assessing mtDNA copy number by quantitative PCR**

The relative copy number of mtDNA was determined by real-time PCR of the DNA encoding mitochondrial CytB using the nuclear, single-copy gene for amyloid precursor protein (APP) as a reference. Total cellular DNA was isolated using a DNeasy Blood and Tissue Kit (Qiagen). The reactions were performed as described above. Copy numbers of CytB and APP were determined by Taqman PCR on an ABI Prism 7600 using the standard curve (absolute quantification) method.

#### **Ribonuclease protection assay (RPA)**

In order to prepare an antisense RNA probe that anneals to the 3' end of the 12 S transcript with 3' - 20 nt oligo(T) extension, DNA corresponding to the 3' end of human mitochondrial 12 S rRNA was amplified by PCR using the following pair of primers: 5'-TAATACGACTCACTATAGGGAGACTTTTTTTTTTTTTTTTTTTTTTTGTTTCGTCCAAGTG'CACTTCCAG-3' and 5'-AAGTATACTTCAAAGGACATTA ACTAAAACC-3'.

The DNA template was purified using a QIAquick PCR purification column (Qiagen) and radiolabelled antisense RNA probe synthesised using the MAXIscript *in vitro* transcription kit (Ambion, Huntington, Cambs., UK). In brief, 0.2 µg of template DNA was

added to a reaction mixture containing 1× transcription buffer, 0.5 mM ATP, 0.5 mM CTP, 0.5 mM GTP, 3.125 μM [<sup>32</sup>P]UTP (800 Ci·mmol<sup>-1</sup>) and 30 units of T7 enzyme mix in a final volume of 20 μl. The reaction was incubated at 37 °C for 10 min and template DNA was removed by the addition of 2 units of DNase I and a further 15 min incubation at 37 °C.

Total RNA for the nuclease protection assay was isolated from mitochondria of the control HEK293T cells and PDE12-expressing HEK293T cells following 4 days doxycycline induction using TRIzol reagent following the manufacturer's protocol (Invitrogen). All assays used the ribonuclease protection assay kit (RPA III, Ambion). In brief, 5 μg of mitochondrial RNA was mixed with 8 × 10<sup>4</sup> cpm probe. Two yeast RNA samples were also prepared as controls. RNAs were then co-precipitated by adding 0.5 M NH<sub>4</sub>OAc and 2.5 volumes of ethanol and incubating at -20 °C for 15 min, followed by centrifugation at 10,000 × g for 15 min at 4 °C. Supernatants were aspirated and pellets resuspended in 10 μl of RPAIII hybridisation buffer. Samples were heated at 95 °C for 3 min followed by an overnight incubation at 42 °C. A 1:100 working dilution of RNase A/RNase T<sub>1</sub> in RNase digestion III buffer was prepared and 150 μl was added to each of the sample tubes and one of the yeast tubes. All reactions were incubated for 30 min at 37 °C before being terminated by the addition of 225 μl of RNase inactivation/precipitation solution. The samples were incubated at -20 °C for at least 20 min followed by centrifugation at 10,000 × g for 15 min at 4 °C. The supernatant was removed and RNA was dissolved in 10 μl of gel loading buffer. Samples were incubated for 3 min at 95 °C before being loaded onto a 6 % acrylamide/8 M urea gel and electrophoresed at 50 W. The gel was then dried and products visualised with a PhosphorImager system.

## SUPPLEMENTARY TABLES

### Supplementary Table S1

| Short name   | Uniprot Acc. No. | Database name      | Full name                                                                              | Region used for alignment |
|--------------|------------------|--------------------|----------------------------------------------------------------------------------------|---------------------------|
| ANGEL1       | Q9UNK9           | ANGE1_HUMAN        | Protein angel homolog 1 (670 residues)                                                 | 245-663                   |
| ANGEL2       | Q5VTE6           | ANGE2_HUMAN        | Protein angel homolog 2 (544 residues)                                                 | 167-540                   |
| NOC          | Q9UK39           | NOCT_HUMAN         | Nocturnin (431 residues)                                                               | 143-421                   |
| <b>PDE12</b> | <b>Q6L8Q7</b>    | <b>PDE12_HUMAN</b> | <b>2',5'-phosphodiesterase 12 EC=3.1.4.- (609 residues)</b>                            | 295-606                   |
| CNOT6        | Q9ULM6           | CNOT6_HUMAN        | CCR4-NOT transcription complex subunit 6 EC=3.1.-.- (557 residues)                     | 189-538                   |
| CNO6L        | Q96LI5           | CNO6L_HUMAN        | CCR4-NOT transcription complex subunit 6-like EC=3.1.-.- (555 residues)                | 189-536                   |
| DNAS1        | P24855           | DNAS1_HUMAN        | Deoxyribonuclease-1 EC=3.1.21.1 (282 residues)                                         | 23-281                    |
| DNSL1        | P49184           | DNSL1_HUMAN        | Deoxyribonuclease-1-like 1 EC=3.1.21.- (302 residues)                                  | 19-272                    |
| DNSL2        | Q92874           | DNSL2_HUMAN        | Deoxyribonuclease-1-like 2 EC=3.1.21.- (299 residues)                                  | 22-295                    |
| DNSL3        | Q13609           | DNSL3_HUMAN        | Deoxyribonuclease gamma EC=3.1.21.- (305 residues)                                     | 21-281                    |
| I5P1         | Q14642           | I5P1_HUMAN         | Type I inositol-1,4,5-trisphosphate 5-phosphatase EC=3.1.3.56 (412 residues)           | 12-392                    |
| INP5E        | Q9NRR6           | INP5E_HUMAN        | 72 kDa inositol polyphosphate 5-phosphatase EC=3.1.3.36 (644 residues)                 | 301-591                   |
| SHIP2        | O15357           | SHIP2_HUMAN        | Phosphatidylinositol-3,4,5-trisphosphate 5-phosphatase 2 EC=3.1.3.n1 (1258 residues)   | 426-725                   |
| SHIP1        | Q92835           | SHIP1_HUMAN        | Phosphatidylinositol-3,4,5-trisphosphate 5-phosphatase 1 EC=3.1.3.n1 (1189 residues)   | 406-708                   |
| INP5K        | Q9BT40           | INP5K_HUMAN        | Inositol polyphosphate 5-phosphatase K EC=3.1.3.56 (448 residues)                      | 16-318                    |
| PI5PA        | Q15735           | PI5PA_HUMAN        | Phosphatidylinositol 4,5-bisphosphate 5-phosphatase A EC=3.1.3.56 (1006 residues)      | 425-728                   |
| I5P2         | P32019           | I5P2_HUMAN         | Type II inositol-1,4,5-trisphosphate 5-phosphatase EC=3.1.3.36 (993 residues)          | 347-636                   |
| OCRL         | Q01968           | OCRL_HUMAN         | Inositol polyphosphate 5-phosphatase OCRL-1 EC=3.1.3.36 (901 residues)                 | 242-531                   |
| SYNJ2        | O15056           | SYNJ2_HUMAN        | Synaptojanin-2 EC=3.1.3.36 (1496 residues)                                             | 532-862                   |
| SYNJ1        | O43426           | SYNJ1_HUMAN        | Synaptojanin-1 EC=3.1.3.36 (1573 residues)                                             | 535-866                   |
| NSMA         | O60906           | NSMA_HUMAN         | Sphingomyelin phosphodiesterase 2 EC=3.1.4.12 (423 residues)                           | 9-279                     |
| NSMA2        | Q9NY59           | NSMA2_HUMAN        | Sphingomyelin phosphodiesterase 3 EC=3.1.4.12 (655 residues)                           | 327-646                   |
| APEX1        | P27695           | APEX1_HUMAN        | DNA-(apurinic or apyrimidinic site) lyase EC=4.2.99.18 (318 residues)                  | 62-316                    |
| APEX2        | Q9UBZ4           | APEX2_HUMAN        | DNA-(apurinic or apyrimidinic site) lyase 2 EC=4.2.99.18 (518 residues)                | 2-311                     |
| EEPD1        | Q7L9B9           | EEPD1_HUMAN        | Endonuclease/exonuclease/phosphatase family domain-containing protein 1 (569 residues) | 261-538                   |
| A0AR24       | A0AR24           | A0AR24_HUMAN       | Putative exonuclease (204 residues)                                                    | 8-201                     |
| TTRAP        | O95551           | TTRAP_HUMAN        | TRAF and TNF receptor-associated protein (362 residues)                                | 114-358                   |

### Supplementary Table S1

Uniprot accession numbers and names, and corresponding short names (column 1) used in the phylogenetic tree in Figure 1A. The region containing the EEP domain (PF03372) used in the alignment is also indicated for each entry.

## Supplementary Table S2

| Mitochondrial transcript                         | Number of clones |
|--------------------------------------------------|------------------|
| <b>CO2</b>                                       |                  |
| <b>Control untransfected HEK293T (11 clones)</b> |                  |
| ...ACCCTATAGCACCCCTCTACCCCTCTAGACAGCC -poly(A)   | 7                |
| ...ACCCTATAGCACCCCTCTACCCCTCTAGACAGC -poly(A)    | 3                |
| ...ACCCTATAGCACCCCTCTACCCCTCTAGACAGCC -A32       | 1                |
| <b>Uninduced PDE12 WT (23 clones)</b>            |                  |
| ...ACCCTATAGCACCCCTCTACCCCTCTAGACAGCC -poly(A)   | 16               |
| ...ACCCTATAGCACCCCTCTACCCCTCTAGACAGC -poly(A)    | 6                |
| ...ACCCTATAGCACCCCTCTACCCCTCTAGACAGCC -A38       | 1                |
| <b>Induced PDE12 WT 2 days (33 clones)</b>       |                  |
| ...ACCCTATAGCACCCCTCTACCCCTCTAGACAGCC -poly(A)   | 15               |
| ...ACCCTATAGCACCCCTCTACCCCTCTAGACAGC -poly(A)    | 2                |
| ...ACCCTATAGCACCCCTCTACCCCTCTAGACAGCC -A39       | 1                |
| ...ACCCTATAGCACCCCTCTACCCCTCTAGACAGC -A39        | 2                |
| ...ACCCTATAGCACCCCTCTACCCCTCTAGACAGC -A38        | 2                |
| ...ACCCTATAGCACCCCTCTACCCCTCTAGACAGCC -A36       | 2                |
| ...ACCCTATAGCACCCCTCTACCCCTCTAGACAGC -A36        | 1                |
| ...ACCCTATAGCACCCCTCTACCCCTCTAGACAGC -A35        | 1                |
| ...ACCCTATAGCACCCCTCTACCCCTCTAGACAGC -A34        | 1                |
| ...ACCCTATAGCACCCCTCTACCCCTCTAGACAGCC -A29       | 2                |
| ...ACCCTATAGCACCCCTCTACCCCTCTAGACAGCC -A5        | 1                |
| ...ACCCTATAGCACCCCTCTACCCCTCTAGACAGCC -A4        | 1                |
| ...ACCCTATAGCACCCCTCTACCCCTCTAGACAGCC -A1        | 1                |
| ...ACCCTATAGCACCCCTCTACCCCTCT -A0                | 1                |
| <b>Induced PDE12 WT 4 days (26 clones)</b>       |                  |
| ...ACCCTATAGCACCCCTCTACCCCTCTAGACAGCC -poly(A)   | 10               |
| ...ACCCTATAGCACCCCTCTACCCCTCTAGACAGC -poly(A)    | 2                |
| ...ACCCTATAGCACCCCTCTACCCCTCTAGACAGCC -A39       | 1                |
| ...ACCCTATAGCACCCCTCTACCCCTCTAGACAGCC -A36       | 1                |
| ...ACCCTATAGCACCCCTCTACCCCTCTAGACAGCC -A36       | 1                |
| ...ACCCTATAGCACCCCTCTACCCCTCTAGACAGC -A36        | 1                |
| ...ACCCTATAGCACCCCTCTACCCCTCTAGACAGCC -A34       | 1                |
| ...ACCCTATAGCACCCCTCTACCCCTCTAGACAGCC -A33       | 1                |
| ...ACCCTATAGCACCCCTCTACCCCTCTAGACAGCC -A31       | 1                |
| ...ACCCTATAGCACCCCTCTACCCCTCTAGACAGC -A27        | 1                |
| ...ACCCTATAGCACCCCTCTACCCCTCTAGACAGCC -A26       | 1                |
| ...ACCCTATAGCACCCCTCTACCCCTCTAGACAGC -A8         | 1                |
| ...ACCCTATAGCACCCCTCTACCCCTCTAGACAGCC -A4        | 2                |
| ...ACCCTATAGCACCCCTCTACCCCTCTAGACAGC -A0         | 1                |
| ...ACCCTATAGCACCCCTCTACCCCTCT -A0                | 1                |
| <b>Induced PDE12 E351A 4days (10 clones)</b>     |                  |
| ...ACCCTATAGCACCCCTCTACCCCTCTAGACAGCC -poly(A)   | 8                |
| ...ACCCTATAGCACCCCTCTACCCCTCTAGACAGC -poly(A)    | 2                |
| <b>ND1</b>                                       |                  |
| <b>Control untransfected HEK293T (9 clones)</b>  |                  |
| ...TCAAATCTCCAGCATTCCCCCTCAAACCTA -poly(A)       | 8                |
| ...TCAAATCTCCAGCATTCCCCCTCAAACCTA -A33           | 1                |
| <b>Uninduced PDE12 WT (23 clones)</b>            |                  |
| ...TCAAATCTCCAGCATTCCCCCTCAAACCTA -poly(A)       | 19               |
| ...TCAAATCTCCAGCATTCCCCCTCAAACCTA -A34           | 1                |
| ...TCAAATCTCCAGCATTCCCCCTCAAACCTA -A33           | 1                |
| ...TCAAATCTCCAGCATTCCCCCTCAAACCTA -A26           | 1                |
| ...TCAAATCTCCAGCATTCCCCCTCAAACCTA -A5            | 1                |
| <b>Induced PDE12 WT 2 days (21 clones)</b>       |                  |
| ...TCAAATCTCCAGCATTCCCCCTCAAACCTA -A9            | 1                |
| ...TCAAATCTCCAGCATTCCCCCTCAAACCTA -A4            | 1                |
| ...TCAAATCTCCAGCATTCCCCCTCAAACCTA -A3            | 2                |
| ...TCAAATCTCCAGCATTCCCCCTCAAACCTA -A0            | 1                |
| ...TCAAATCTCCAGCATTCCCCCTCA -A0                  | 8                |
| ...TCAAATCTCCAGCATTCCCCCT -A38                   | 1                |
| ...TCAAATCTCCAGCATTCCCCCT -A35                   | 2                |
| ...TCAAATCTCCAGCATTCCCCCT -A33                   | 1                |
| ...TCAAATCTCCAGCATTCCCCCT -A2                    | 3                |
| <b>Induced PDE12 WT 4 days (17 clones)</b>       |                  |
| ...TCAAATCTCCAGCATTCCCCCTCAAACCTA -A32           | 1                |
| ...TCAAATCTCCAGCATTCCCCCTCAAACCTA -A28           | 1                |
| ...TCAAATCTCCAGCATTCCCCCTCAAACCTA -A7            | 1                |
| ...TCAAATCTCCAGCATTCCCCCTCAAAC -A0               | 1                |
| ...TCAAATCTCCAGCATTCCCCCTCAA -A0                 | 1                |
| ...TCAAATCTCCAGCATTCCCCCTCA -A0                  | 5                |
| ...TCAAATCTCCAGCATTCCCCCT -A39                   | 2                |
| ...TCAAATCTCCAGCATTCCCCCT -A38                   | 2                |
| ...TCAAATCTCCAGCATTCCCCCT -A36                   | 1                |
| ...TCAAATCTCCAGCATTCCCCCT -A31                   | 1                |
| ...TCAAATCTCCAGCATTCCCCCT -A9                    | 1                |
| <b>Induced PDE12 E351A 4days (10 clones)</b>     |                  |
| TCAAATCTCCAGCATTCCCCCTCAAACCTA -poly(A)          | 9                |
| TCAAATCTCCAGCATTCCCCCTCAAACCTA -A38              | 1                |

## Supplementary Table S2

**cRT-PCR sequence analysis of mitochondrial transcripts in controls and cells overexpressing PDE12.** Partial or complete stop codons are indicated in blue. In the case of ND1 one adenine must be added to the 3' of the mRNA to create the TAA stop codon. Poly(A) indicates an extension of 40 or more adenosine residues.

## SUPPLEMENTARY FIGURE LEGENDS

### Supplementary Figure S1

**Multiple protein sequence alignment of the catalytic domain of confirmed and putative human deadenylases of the EEP family.** The EEP domains of human proteins of the “Deadenylases” subgroup as indicated in Figure 1A of the main text were aligned using CustalW2. The boundaries of the sequence segment used in the alignment are indicated. The secondary structure alignment is based on the resolved structure of the human CNOT6L and is indicated above the alignment (helix, H, red font and strand, E, blue font). Active site residues involved in the binding of  $Mg^{2+}$  are indicated in yellow.

### Supplementary Figure S2

#### **(A) Mitochondrial localisation of PDE12.Strep2.Flag**

The HEK293T cells containing Flp-In-integrated PDE12.Flag.Strep2 (lanes 1-4) or the E351A mutant (lanes 5-8) were induced for 2 days with 50  $\mu$ g/ml of doxycycline and fractionated into unbroken cells and cell debris (D, lanes 2 and 6), cytosol (C, lanes 3 and 7) and mitochondria (M, lanes 4 and 8). ‘T’ denotes the total cell lysate. The protein fractions were analysed by Western blotting using anti-FLAG antibodies. The location of PDE12.Strep2.Flag was compared with that of the following marker proteins: UNG1 (mitochondrial matrix), UNG2 (nucleus) and GAPDH (cytosol).

#### **(B) Purification of PDE12.Strep2.Flag**

PDE12.Flag.Strep2 and the E351A mutant were purified as described in **Materials and Methods**, 22  $\mu$ g of each protein were analysed by SDS-PAGE and visualised by Coomassie staining. MW – Molecular weight marker.

### Supplementary Figure S3

#### Effect of PDE12 overexpression on lactic fermentation.

The levels of medium acidification (yellow colour) was analysed for the HEK293T cells containing Flp-In-integrated PDE12.Flag.Strep2 (top) or the E351A mutant (bottom) in a 8-day time course. The cells were seeded at  $5 \times 10^4$  cells/well of a 6-well plate and induced with 50  $\mu\text{g/ml}$  of doxycycline.

### Supplementary Figure S4

#### Mapping the 3' end of 12S rRNA by RNase Protection Assay (RPA).

(A) Schematic representation of the 12S rRNA specific RPA.

(B) Electrophoretic analysis of the protected probe. RNA isolated from purified mitochondria of parental HEK293T cells (H, lanes 2 and 6), HEK293T cells overexpressing PDE12 for 4 days (PDE12, lanes 3 and 7) or total RNA isolated from yeast (Y, lanes 5 and 9) were incubated with an antisense RNA probes that anneal to the 3' end of 12S or 16S rRNA and treated with RNase A/RNase T1 as described in **Materials and Methods**. After RNase digestion, protected probes were analysed in a 5% polyacrylamide urea gel. 'L' denotes size ladder (lane 1).

(C) Northern blot analyses of mitochondrial tRNAs in the total RNA isolated from the HEK293T cells (H) and cells overexpressing PDE12 for 0, 2 or 4 days. The RNA samples were resolved in 4 % polyacrylamide urea gel.

(D) Quantification of steady-state levels of the mitochondrial tRNAs in cells overexpressing PDE12 for 4 days analysed by Northern blots. The values of the relative RNA level (mt-tRNA/ND3 mRNA) were obtained by quantifying PhosphoImager scans of blots in the ImageQuant software.  $n = 3$  for tRNA<sup>Ser-AGY</sup>,  $n = 2$  for remaining tRNAs, error bars = 1 SD.

```

EEEEEEEEEE              HHHHHHHHHH  EEEEEEEEEEHHHHHHHHHHHHHHHHEEEEEEEEE
CNOT6L      188: SFTVMCYNVLCDK (5)LYGYCPSWALNWEYRKKGIMEEIVNCDADIISLQEVETEYQYFTLFLPALKERGYDGGFFSPKS :267
CNOT6       188: LFSVMCYNVLCDK (5)LYGYCPSWALNWDYRKKAI IQEILSCNADIVSLQEVETEYQYSFFLVELKERGYNGFFSPKS :267
ANGEL1     244: QFTLMSYNILAQD (7)LYLHCHPDILNWNVYRFVNLMOEFQHWDPDILCQEVQEDHYWEQLEPSLRMMGFTCFYKRRT :325
ANGEL2     166: DFSVMSYNILSQD (7)LYRHCRRPVLHWSFRFPNLIKFKHFADAVLCQEVQEDHYGAEIRPSLESLSGYHCEYKMRT :247
NOC        142: PIRVMQWNILAQA (6)NFVQCPVEALKWEERKCLILEEILAYQPDILCQEVVD--HYFDTFQPLLSRLGYQGTFPPKP :220
PDE12     294: LIRTVSYNILADT(10)LYPYCAPYALELDYRQNLIQKELTGYNADVICQEVVDRAVFSDSLVPALEAFGLEGVFRIKQ :378
          :  :  : * : * . : : * : : * : * : * : * : * : * : * :

```

```

EEEEEEEEEEEEEEEEEEEEEE EEEEEEEEEEE HHHHHHHHHHHHHHHHHHHHHH
CNOT6L      (12) VDGCAIFFKTEKFTLVQKHTVEFN(47)KQLLIVANAHMHWDPEYSDVKLIQTMMFVSEVKNILEK :388
CNOT6       (12) VDGCAIFFKTEKFTLVQKHTVEFN(48)KQLILVANAHMHWDPEYSDVKLVQTMFFLSEVKNIIDK :389
ANGEL1      (3) TDGCAVCYKPTRFRLLCASPVEYF(30)VAPLCVANATHILYNPRRGDVKLAQMAILLAEVDKVARL :420
ANGEL2      (3) PDGCAICFKHKSFKSLLSVNPVEFF(26)CPAICVANATHLLYNPRRGDIKLTQLAMLLAEISSVAHQ :338
NOC         (12) PDGCALFFLQNRFKLVNSANIRLT(22)GRQFCIAVTHLKARTGWERFRSAQGCDDLQNLQONITQG :314
PDE12      HEGLATFYRKSKFSLLSQHDISFY(44)SKRICVANTHLYWHPKGGYIRLIQMAVALAHIRHVSCD :484
          : * * : : * * : : : : * : * : . : * : : :

```

```

EEEEEEEEEE HHHHHHHHEEEEE EEEEEEE EEEEE EEEEEEE
CNOT6L      (14) IPLVLCADLNSLPDSGVVEYLSNGGVAD (31)HGFQLSAY (6)YTNYTFD----FKGVIDYIFYSKT :496
CNOT6       (15) IPLVLCADLNSLPDSGVVEYLSSTGGVET (31)HGFKLQ SAY (6)YTNYTFD----FKGIIDYIFYSKP :498
ANGEL1      (5) CPIILCGDLNSVPDSPLYNFIRDGELQY(116)HCLHLTSVY(11)VTTMPLG----LGMTVDYIFFSAE :609
ANGEL2      (3) CPIVMCGDFNSVPGSPLYSFYKEGKLN(75)HFFSLSSVY(11)VTTCHSR----SAITVDYIFYSAE :486
NOC         (2) IPLIVCGDFNAEPTTEEVYKHFASSSLNL (1)SAYKLLSAD (6)YTTWKIRTSGECRHTLDYIWYSKH :384
PDE12      (4) IPVIFCGDFNSTPSTGMYHFVINGSIPE (23)HFFKLKSAC (4)YTNYVGG----FHGCLDYIFIDLN :568
          * : : * * : * : . : : * * : * : * : * :

```

```

HHHHHHHHH EEEEEEEEE
CNOT6L      (10) LDPQWLVENNI (1)GCPHPHPSDHFSLLTQLELHPPLLPLVNGVHLPNRR :555
CNOT6       (10) LDHHLVENNI (1)GCPHPLIPSDHFSLFAQLELLLPLPQVNGIHLPGRR :557
ANGEL1     (20) LGRLSLLSEEI (5)GLPNPFCSSDHLCLLASFGMEVTAP :670
ANGEL2     (20) LARLSLLTEQD (5)GLPNENSSDHLPLLAKFRLEL :544
NOC        (10) LTEEQIGPN-- RLPSFNYPSDHLSLVCDFSFTEESDGLS :431
PDE12     (9) LPSHEEVTTHQ ALPSVSHPSDHIALVCDLKWK :609
          * * . * * : * . :

```



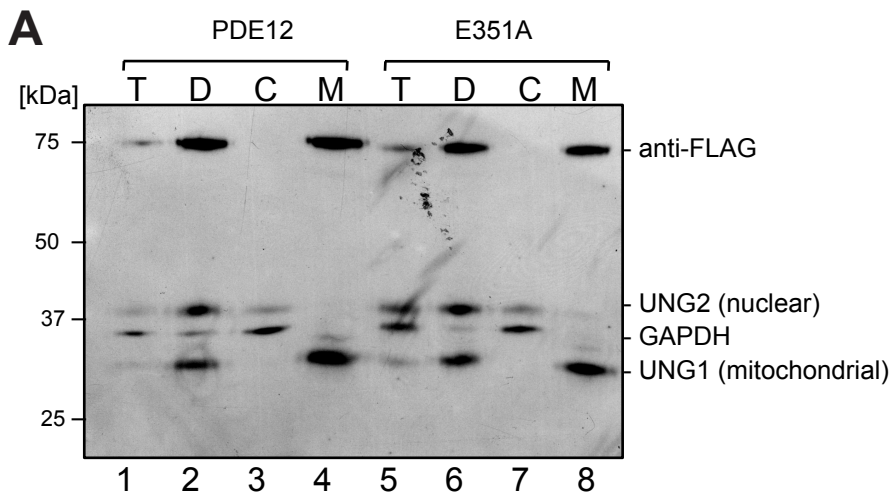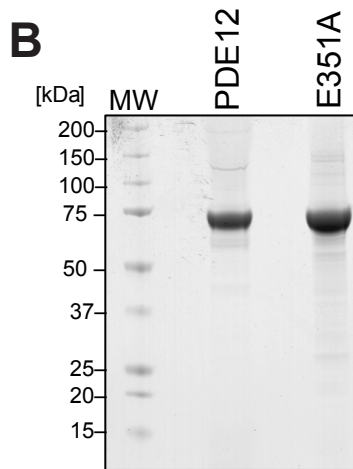

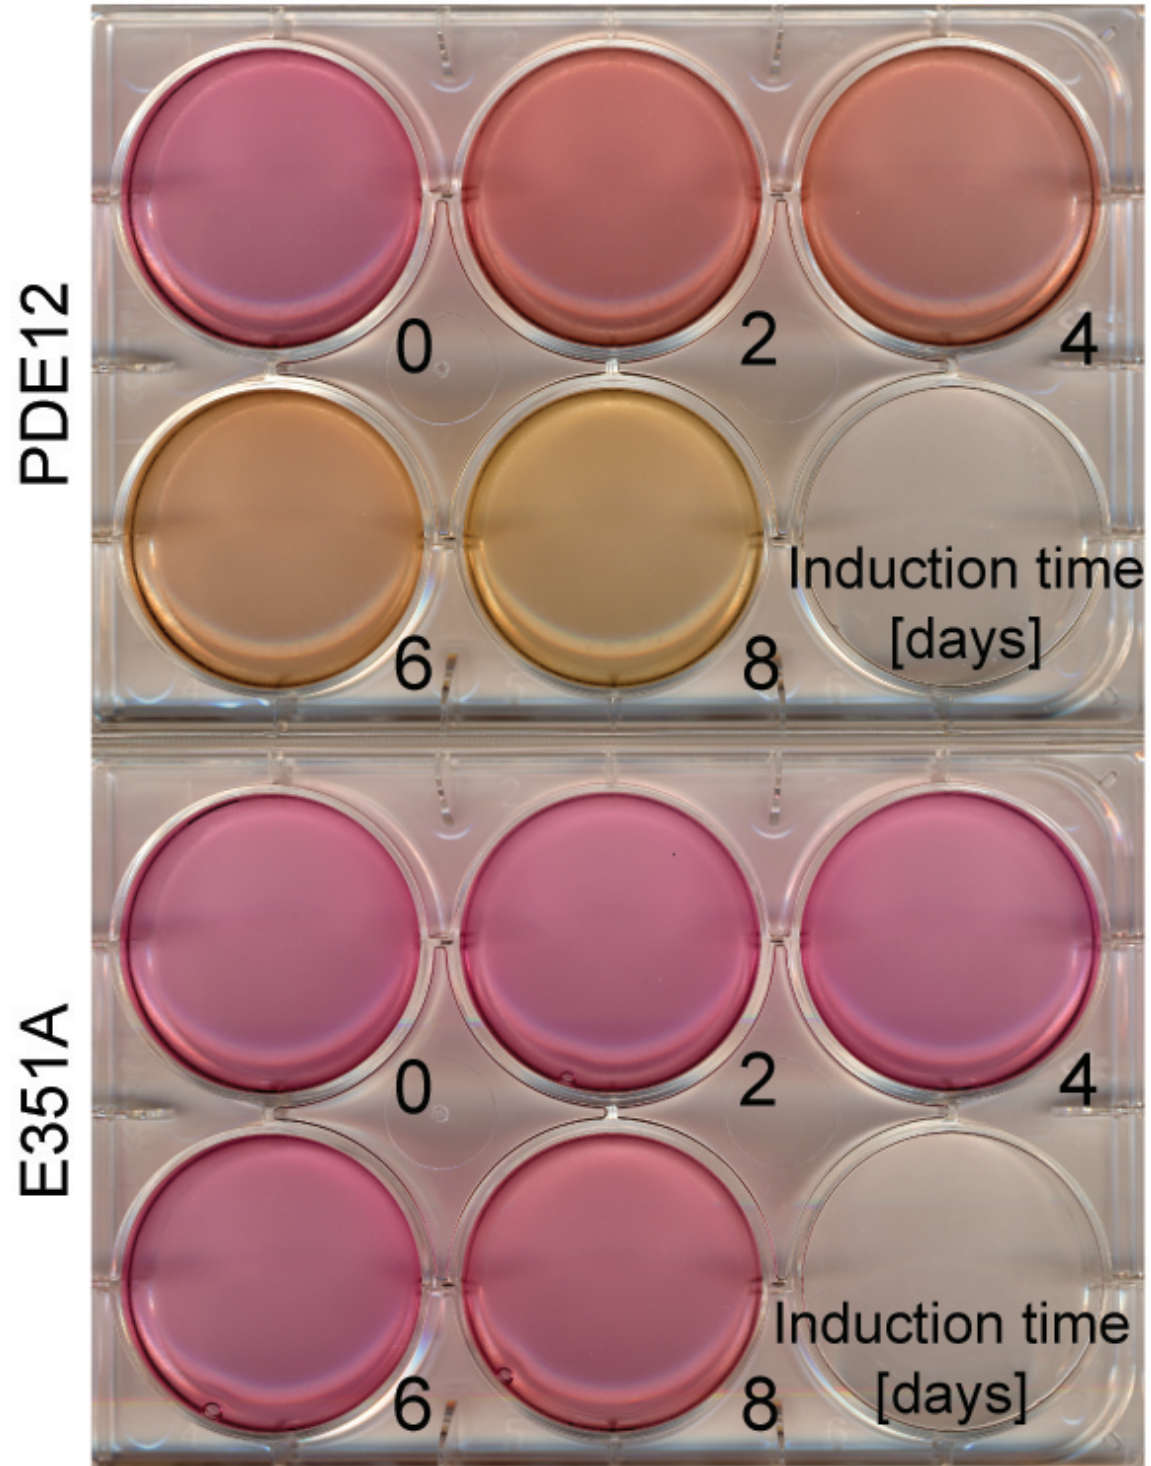

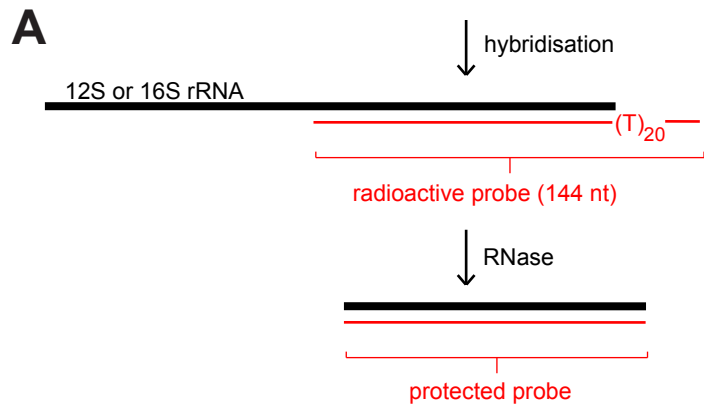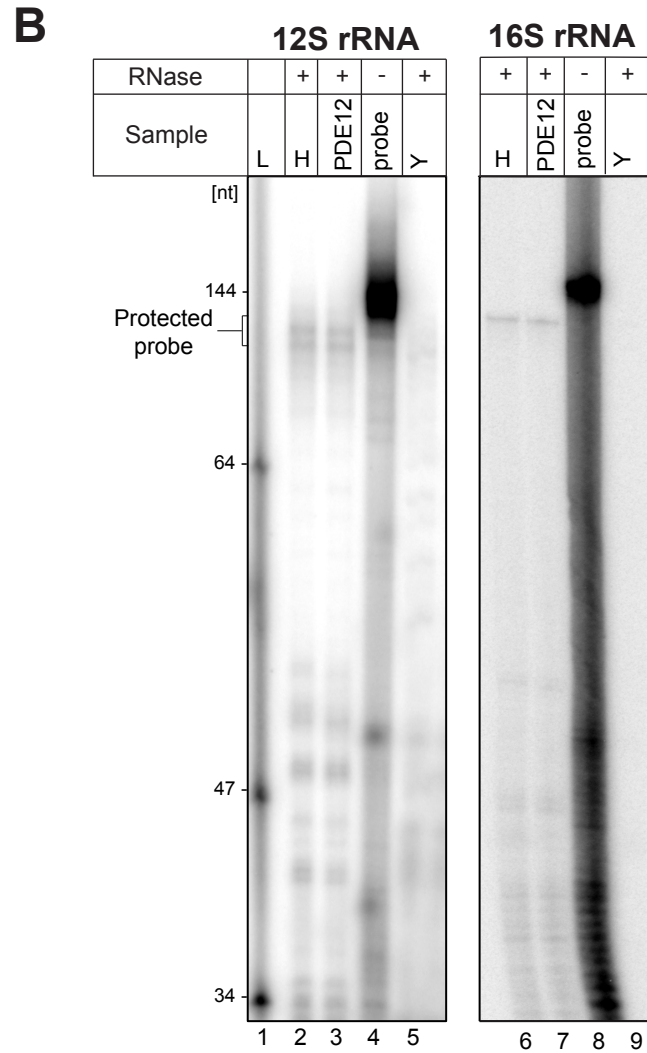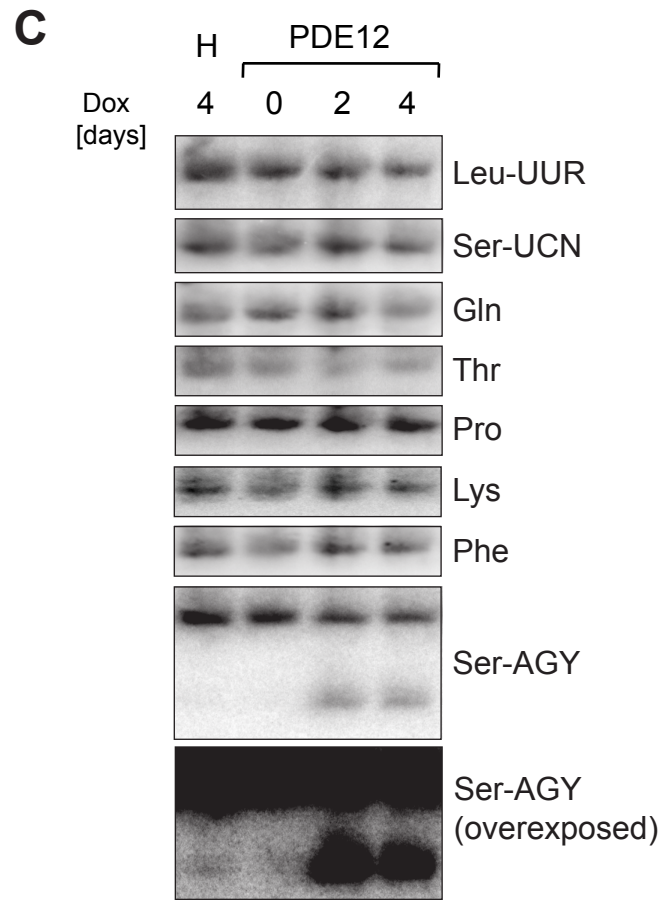

Suppl. Figure S4 - Rorbach et al.

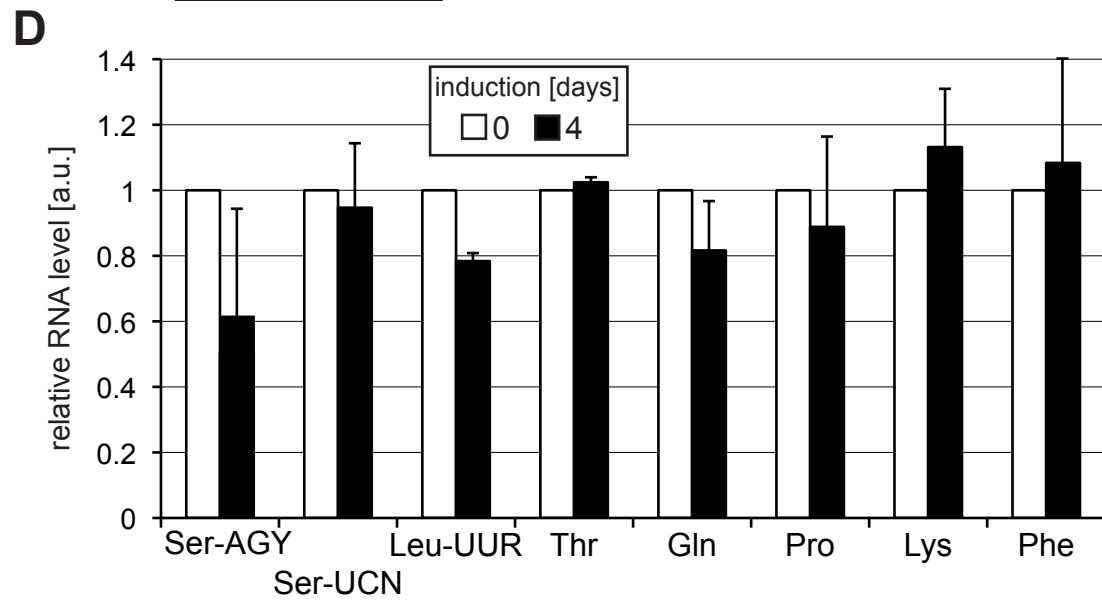

Supplement: supp_gkr470_NAR-00812-C-2011_Supp_data.pdf [file supp_gkr470_NAR-00812-C-2011_Supp_data.pdf]
